# Supplementary material
Source: publisher figshare collection journal article supplement (https://geolsoc.figshare.com/ndownloader/files/16349945)

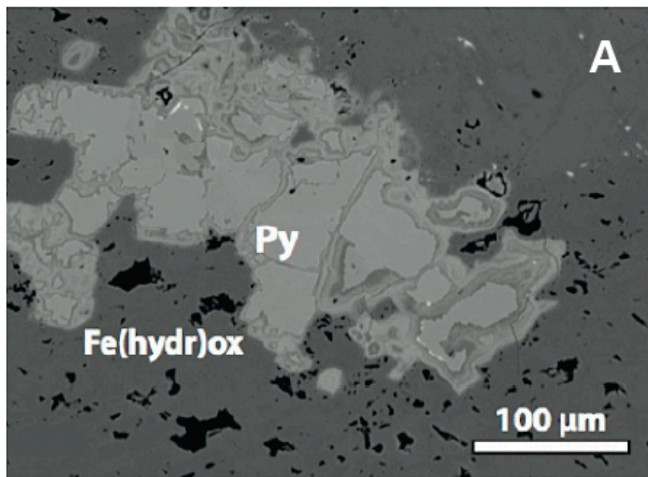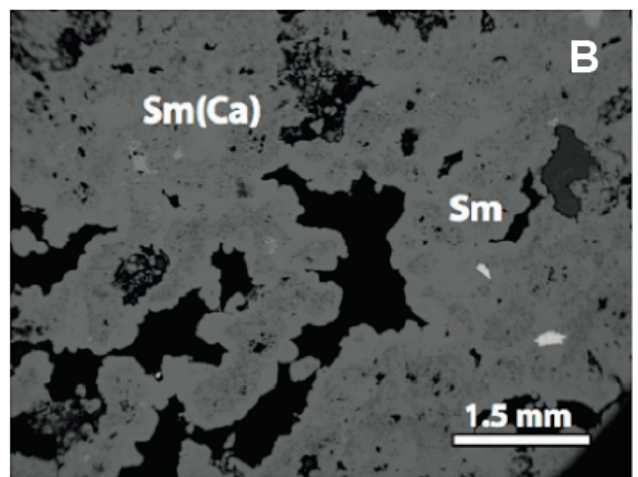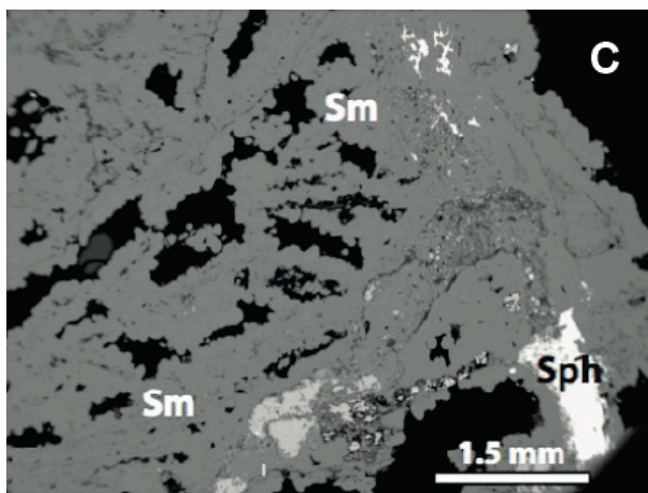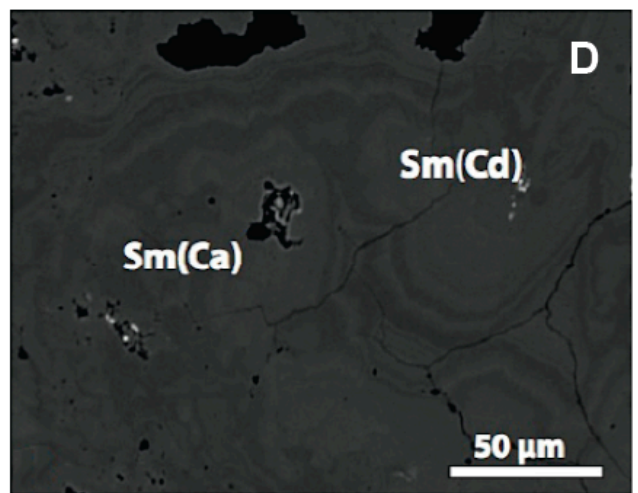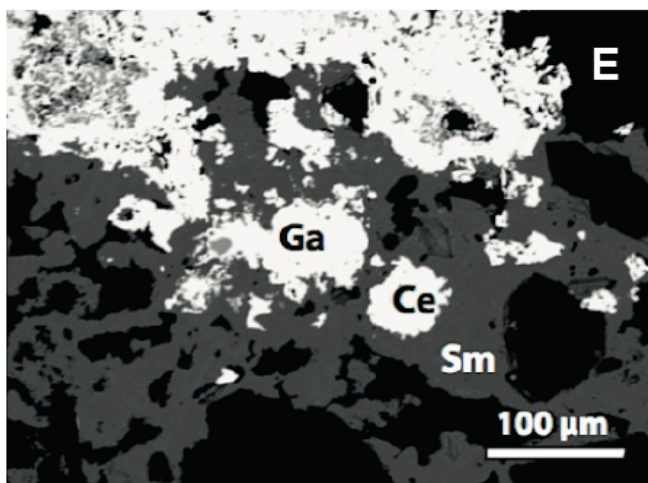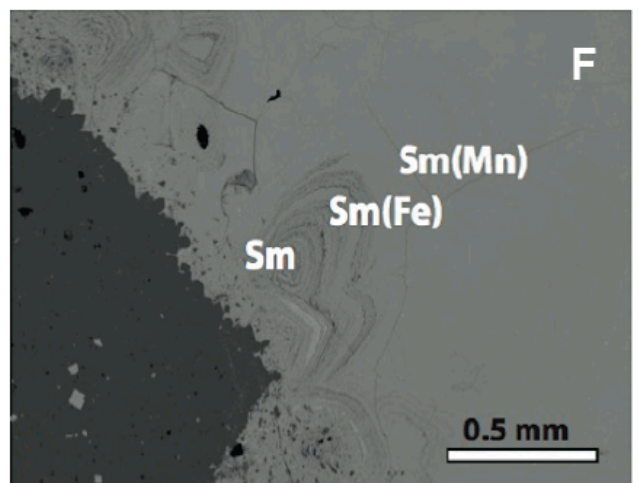

Figure S2 (supplementary material)

Supplement: Supplementary file 1 [file 16349945]
